# Supplementary material
Source: PubMed Central journal article supplement (PMC3927554)
Supplement: NIHMS493362-supplement-Supplementary_materials.pdf [file NIHMS493362-supplement-Supplementary_materials.pdf]

# Supplementary Materials for Bayesian Inference for the Causal Effect of Mediation

M. J. Daniels <sup>\*</sup>, J. Roy <sup>†</sup>, C. Kim <sup>‡</sup>, J.W. Hogan <sup>§</sup>, and M.G. Perri <sup>¶</sup>

**Step 3. of sampling algorithm: Sampling** ( $F_{M_1,1}, F_{M_1,0}, F_{M_0,1}, F_{M_0,0}, \pi_{1,M_1}, \pi_{0,M_0}$ )

1. Generate  $L$  sets  $(M_0, M_1)$ . This requires sampling from  $f_{M_z, M_{z'}}(m_z, m_{z'}) = f_{M_z}(m_z | m_{z'}) f_{M_{z'}}(m_{z'})$ .

Note that in the TOURS trial,  $M_z$  is actually discrete (taking integer values 0 to 350), so we compute  $f_{M_z}(m_z)$  as follows,

$$f_{M_z}(m_z) = F_{M_z}(m_z + 0.5) - F_{M_z}(m_z - 0.5); z = 0, 1$$

where  $F_{M_z} = F_{M_z,1} \times \pi_{1,M_1} + F_{M_z,0} \times (1 - \pi_{1,M_1})$ .

We sample  $M_{z'}$  using  $F_{M_{z'}}(M_{z'}) \sim Unif(0, 1)$ . Then, given  $M_{z'}$ , we obtain  $M_z$  using the conditional CDF

$$\begin{aligned} F_{M_z}(m_z | m_{z'}) &= \sum_{t=0}^{m_z} f_{M_z}(t | m_{z'}) \\ &= \frac{\sum_{t=0}^{m_z} f_{M_z, M_{z'}}(t, m_{z'})}{f_{M_{z'}}(m_{z'})} \\ &= \frac{F_{M_z, M_{z'}}(m_z + 0.5, m_{z'} + 0.5) - F_{M_z, M_{z'}}(m_z + 0.5, m_{z'} - 0.5)}{F_{M_{z'}}(m_{z'} + 0.5) - F_{M_{z'}}(m_{z'} - 0.5)} \end{aligned}$$

using the fact  $F_{M_z}(M_z | m_{z'}) \sim Unif(0, 1)$ .

---

<sup>\*</sup>Department of Statistics, University of Florida, Gainesville, FL 32611

<sup>†</sup>Department of Biostatistics, University of Pennsylvania, Philadelphia, PA

<sup>‡</sup>Department of Statistics, University of Florida, Gainesville, FL 32611

<sup>§</sup>Department of Biostatistics, Brown University, Providence, RI

<sup>¶</sup>Department of Clinical and Health Psychology, University of Florida, Gainesville, FL 32611

The densities  $f_{M_z, M_{z'}}(m_z, m_{z'})$  can be computed in the same manner with Assumption 4.

2. Compute  $f_{1, M_0}(y)$  via Monte Carlo integration using the L sets  $(M_0, M_1)$  as follows

$$\begin{aligned} f_{1, M_0}(y) &= \int f_{1, M_0}(y|m_0, m_1) f_{M_0, M_1}(m_0, m_1) dm_0 dm_1 \\ &= \frac{1}{C(\chi, \epsilon)} \int \exp\{\text{sgn}(d) \log \chi y I(|d| \geq \epsilon)\} f_{1, M_1}(y|m_0, m_1) f_{M_0, M_1}(m_0, m_1) dm_0 dm_1 \text{ (A 2)} \\ &= \frac{1}{C(\chi, \epsilon)} \int \exp\{\text{sgn}(d) \log \chi y I(|d| \geq \epsilon)\} f_{1, M_1}(y|m_0) f_{M_0, M_1}(m_0, m_1) dm_0 dm_1 \text{ (A 3)}, \end{aligned}$$

where 'A' corresponds to 'Assumption' and  $C(\chi, \epsilon)$  denotes a normalizing constant which can be obtained as

$$C(\chi, \epsilon) = \sum_{y=0}^1 \int \exp\{\text{sgn}(d) \log \chi y I(|d| \geq \epsilon)\} f_{1, M_1}(y|m_0) f_{M_0, M_1}(m_0, m_1) dm_0 dm_1.$$

To compute  $f_{1, M_1}(y|m_0)$ ,

$$f_{1, M_1}(y|m_0) = \frac{\pi_{1, M_1}^y (1 - \pi_{1, M_1})^{1-y} f_{M_1, Y_1}(M_1 = m_0 | Y_{1, M_1} = y)}{f_{M_1}(M_1 = m_0)},$$

where

$$f_{M_1, Y_1}(M_1 = m_0 | Y_{1, M_1} = y) = F_{M_1, y}(m_0 + 0.5) - F_{M_1, y}(m_0 - 0.5)$$

and

$$f_{M_1}(M_1 = m_0) = f_{M_1, Y_1}(M_1 = m_0 | Y_{1, M_1} = 1) \times \pi_{1, M_1} + f_{M_1, Y_1}(M_1 = m_0 | Y_{1, M_1} = 0) \times (1 - \pi_{1, M_1}).$$

3. Compute the direct and indirect effects using  $\pi_{1, M_0} - \pi_{0, M_0}$  and  $\pi_{1, M_1} - \pi_{1, M_0}$ , where  $\pi_{1, M_0} = f_{1, M_0}(1)$ .

### Implementation of Dirichlet process priors for the TOURS data in WinBUGS (Step 2 of the sampling algorithm in Section 3)

We use the following construction of the Dirichlet process parameters for implementation in WinBUGS,

$$\gamma_i \sim \text{Beta}(1, K_z), \quad \pi_i = \gamma_i \prod_{l=1}^{i-1} (1 - \gamma_l),$$

$$\theta_i \sim W_z \times \mathbf{Beta}_{[0,350]}(\alpha_{1z}, \beta_{1z}) + (1 - W_z) \times \mathbf{Beta}_{[0,350]}(\alpha_{2z}, \beta_{2z}),$$

$$G_z = \sum_{i=1}^M \pi_i \delta_{\theta_i} \text{ and } f_{M_z, y}(m_z | Y_{z, M_z} = y) \sim G_z$$

where the precision parameter  $K_z$  has a uniform prior, *DiscUnif*[1, 20].

Since the mediator takes values in [0,350], we specify

$$\lambda_i = Q(\theta_i) \text{ and } G_z = \sum_{i=1}^M \pi_i \delta_{\lambda_i}$$

where function  $Q : (0, 350) \rightarrow (-0.5, 350 + 0.5)$ .

We then specify

$$f_{M_z, y}(m_z | Y_{z, M_z} = y) \sim \text{Poisson}(\lambda_S),$$

where  $S \sim \text{categorical}(\pi_1, \pi_2, \dots, \pi_K)$ .

## Comparison of posterior variances with and without Assumption 5

### a) Without Assumption 5

First note that

$$E(Y_{1, M_1} Y_{1, M_0}) = \int p(Y_{11} = 1, Y_{10} = 1 | m_0, m_1) f(m_0, m_1) dm_0 dm_1,$$

where  $p(Y_{11} = 1, Y_{10} = 1 | m_0, m_1) = p(Y_{10} = 1 | Y_{11} = 1, m_0, m_1) p(Y_{11} = 1 | m_0, m_1)$ .

Now, assume  $p(Y_{11} = 1 | m_0, m_1) > 0$  and a non-negative correlation between  $Y_{11}$  and  $Y_{10}$  given  $m_0$  and  $m_1$ . Then the correlation between  $Y_{11}$  and  $Y_{10}$  conditional on  $(M_1, M_0)$ ,  $\theta$ , is

$$\begin{aligned} \theta &= \frac{E(Y_{10} Y_{11} | m_0, m_1) - E(Y_{10} | m_0, m_1) E(Y_{11} | m_0, m_1)}{\sqrt{p(Y_{10} = 1 | m_0, m_1) (1 - p(Y_{10} = 1 | m_0, m_1))} \sqrt{p(Y_{11} = 1 | m_0, m_1) (1 - p(Y_{11} = 1 | m_0, m_1))}} \\ &= \frac{p(Y_{10} = 1, Y_{11} = 1 | m_0, m_1) - p(Y_{10} = 1 | m_0, m_1) p(Y_{11} = 1 | m_0, m_1)}{\sqrt{p(Y_{10} = 1 | m_0, m_1) (1 - p(Y_{10} = 1 | m_0, m_1))} \sqrt{p(Y_{11} = 1 | m_0, m_1) (1 - p(Y_{11} = 1 | m_0, m_1))}} \\ &\geq 0 \end{aligned}$$

Note that

$$p(Y_{10} = 1, Y_{11} = 1|m_0, m_1) = p(Y_{10} = 1|m_0, m_1)p(Y_{11} = 1|m_0, m_1) + \theta \times s.d.(Y_{10})s.d.(Y_{11}),$$

where  $s.d.(Y_{10}) = \sqrt{p(Y_{10} = 1|m_0, m_1)(1 - p(Y_{10} = 1|m_0, m_1))}$  and

$$s.d.(Y_{11}) = \sqrt{p(Y_{11} = 1|m_0, m_1)(1 - p(Y_{11} = 1|m_0, m_1))}.$$

This can be re-expressed as

$$\begin{aligned} p(Y_{10} = 1, Y_{11} = 1|m_0, m_1) \\ = \exp\{sgn(d) \log \chi I(|d| \geq \epsilon)\} p(Y_{11} = 1|M_1 = m_0) p(Y_{11} = 1|M_1 = m_1) + \theta \times s.d.(Y_{10})s.d.(Y_{11}) \end{aligned}$$

by Assumption 2 and 3.

Using these results, the variance of the NIE without assumption 5 is

$$\begin{aligned} \text{Var}(NIE) &= E(Y_{1,M_1}^2) - 2E(Y_{1,M_1}Y_{1,M_0}) + E(Y_{1,M_0}^2) - \{E(Y_{1,M_1}) - E(Y_{1,M_0})\}^2 \\ &= E(Y_{1,M_1}^2) + E(Y_{1,M_0}^2) - \{E(Y_{1,M_1}) - E(Y_{1,M_0})\}^2 - C1, \end{aligned} \quad (1)$$

where  $C1 = 2 \int \exp\{sgn(d) \log \chi I(|d| \geq \epsilon)\} p(Y_{11} = 1|M_1 = m_0) p(Y_{11} = 1|M_1 = m_1) f(m_0, m_1) dm_0 dm_1$   
 $+ 2 \int \theta \times s.d.(Y_{10})s.d.(Y_{11}) f(m_0, m_1) dm_0 dm_1.$

## b) Under Assumption 5

Note that

$$E(Y_{1,M_1}Y_{1,M_0}) = \int p(Y_{11} = 1, Y_{10} = 1|m_0, m_1) f(m_0, m_1) dm_0 dm_1,$$

where

$$\begin{aligned} p(Y_{11} = 1, Y_{10} = 1|m_0, m_1) &= p(Y_{10} = 1|m_0, m_1) p(Y_{11} = 1|m_0, m_1) \\ &= \exp\{sgn(d) \log \chi I(|d| \geq \epsilon)\} p(Y_{11} = 1|M_1 = m_0) p(Y_{11} = 1|M_1 = m_1) \end{aligned}$$

since  $\theta = 0$ .

Using this result, the variance of the NIE with assumption 5 is

$$\begin{aligned}\text{Var}(NIE_w) &= E(Y_{1,M_1}^2) - 2E(Y_{1,M_1}Y_{1,M_0}) + E(Y_{1,M_0}^2) - \{E(Y_{1,M_1}) - E(Y_{1,M_0})\}^2 \\ &= E(Y_{1,M_1}^2) + E(Y_{1,M_0}^2) - \{E(Y_{1,M_1}) - E(Y_{1,M_0})\}^2 - C2.\end{aligned}\quad (2)$$

where  $C2 = 2 \int \exp\{sgn(d) \log \chi I(|d| \geq \epsilon)\} p(Y_{11} = 1 | M_1 = m_0) p(Y_{11} = 1 | M_1 = m_1) f(m_0, m_1) dm_0 dm_1$

### c) Comparison of Var(NIE) with and without Assumption 5

Comparing (2) and (1), the difference is  $C1 - C2$ ,

$$\begin{aligned}C1 &= 2 \int \exp\{sgn(d) \log \chi I(|d| \geq \epsilon)\} p(Y_{11} = 1 | M_1 = m_0) p(Y_{11} = 1 | M_1 = m_1) f(m_0, m_1) dm_0 dm_1 \\ &\quad + 2\theta \int s.d.(Y_{10}) s.d.(Y_{11}) f(m_0, m_1) dm_0 dm_1 \\ &\geq 2 \int \exp\{sgn(d) \log \chi I(|d| \geq \epsilon)\} p(Y_{11} = 1 | M_1 = m_0) p(Y_{11} = 1 | M_1 = m_1) f(m_0, m_1) dm_0 dm_1 \\ &= C2\end{aligned}$$

which is non-negative. Thus, variance of NIE without Assumption 5 has a smaller variance;

$$\text{Var}(NIE) < \text{Var}(NIE_w),$$

where  $\text{Var}(NIE)$  denotes the variance of NIE with Assumption 5 and  $\text{Var}(NIE_w)$  denotes the variance of NIE without Assumption 5.

The difference in the variances,  $A$ , is given as

$$A = 2 \int \theta \times s.d.(Y_{10}) s.d.(Y_{11}) f(m_0, m_1) dm_0 dm_1,$$

where  $\theta$  is bounded as below (since binary responses),

$$\begin{aligned}
\theta &= \frac{E(Y_{10}Y_{11}|m_0, m_1) - E(Y_{10}|m_0, m_1)E(Y_{11}|m_0, m_1)}{s.d.(Y_{10})s.d.(Y_{11})} \\
&\leq \frac{\sqrt{E(Y_{10}^2|m_0, m_1)E(Y_{11}^2|m_0, m_1)} - E(Y_{10}|m_0, m_1)E(Y_{11}|m_0, m_1)}{s.d.(Y_{10})s.d.(Y_{11})} \quad \text{Cauchy-Schwarz inequality} \\
&= \frac{\sqrt{p(Y_{10} = 1|m_0, m_1)p(Y_{11} = 1|m_0, m_1)} - p(Y_{10} = 1|m_0, m_1)p(Y_{11} = 1|m_0, m_1)}{s.d.(Y_{10})s.d.(Y_{11})} \\
&= \frac{\sqrt{\exp\{sgn(d) \log \chi I(|d| \geq \epsilon)\}p(Y_{11} = 1|M_1 = m_0)p(Y_{11} = 1|M_1 = m_1)}}{s.d.(Y_{10})s.d.(Y_{11})} \\
&\quad - \frac{\exp\{sgn(d) \log \chi I(|d| \geq \epsilon)\}p(Y_{11} = 1|M_1 = m_0)p(Y_{11} = 1|M_1 = m_1)}{s.d.(Y_{10})s.d.(Y_{11})},
\end{aligned}$$

where the last equality is from Assumption 2 and 3.

Thus, the difference in the variances,  $A$  is bounded by

$$A \leq 2 \int (\sqrt{p^*} - p^*) f(m_0, m_1) dm_0 dm_1,$$

where  $p^* = \exp\{sgn(d) \log \chi I(|d| \geq \epsilon)\}p(Y_{11} = 1|M_1 = m_0)p(Y_{11} = 1|M_1 = m_1)$ .

|                  |              | $\chi = 1$      |         |                 |         |                  |         |
|------------------|--------------|-----------------|---------|-----------------|---------|------------------|---------|
|                  |              | $\epsilon = 50$ |         | $\epsilon = 75$ |         | $\epsilon = 100$ |         |
|                  |              | NIE             | s.d.    | NIE             | s.d.    | NIE              | s.d.    |
| $\beta_2 = 0$    | Our Approach | 0.024           | (0.036) | 0.033           | (0.040) | 0.038            | (0.039) |
|                  | Truth        | 0.024           | (0.036) | 0.033           | (0.040) | 0.038            | (0.039) |
| $\beta_2 = 1.28$ | Our Approach | 0.004           | (0.044) | -0.0008         | (0.045) | 0.004            | (0.041) |
|                  | Truth        | 0.001           | (0.043) | -0.004          | (0.045) | 0.001            | (0.041) |
| $\beta_2 = 2.56$ | Our Approach | -0.017          | (0.042) | -0.017          | (0.033) | -0.028           | (0.040) |
|                  | Truth        | 0.003           | (0.038) | 0.006           | (0.031) | -0.006           | (0.038) |
| $\beta_2 = 5.12$ | Our Approach | -0.059          | (0.037) | -0.065          | (0.035) | -0.063           | (0.033) |
|                  | Truth        | 0.002           | (0.027) | -0.001          | (0.028) | 0.0007           | (0.025) |

|                  |              | $\chi = 1.15$   |         |                 |         |                  |         |
|------------------|--------------|-----------------|---------|-----------------|---------|------------------|---------|
|                  |              | $\epsilon = 50$ |         | $\epsilon = 75$ |         | $\epsilon = 100$ |         |
|                  |              | NIE             | s.d.    | NIE             | s.d.    | NIE              | s.d.    |
| $\beta_2 = 0$    | Our Approach | 0.014           | (0.037) | 0.022           | (0.048) | 0.018            | (0.040) |
|                  | Truth        | 0.014           | (0.037) | 0.022           | (0.048) | 0.018            | (0.040) |
| $\beta_2 = 1.28$ | Our Approach | -0.0002         | (0.038) | 0.001           | (0.045) | -0.0001          | (0.042) |
|                  | Truth        | -0.002          | (0.038) | -0.001          | (0.046) | -0.003           | (0.041) |
| $\beta_2 = 2.56$ | Our Approach | -0.016          | (0.039) | -0.018          | (0.039) | -0.010           | (0.037) |
|                  | Truth        | 0.003           | (0.036) | 0.002           | (0.036) | 0.008            | (0.036) |
| $\beta_2 = 5.12$ | Our Approach | -0.051          | (0.039) | -0.049          | (0.032) | -0.059           | (0.037) |
|                  | Truth        | 0.009           | (0.029) | 0.006           | (0.026) | 0.003            | (0.028) |

|                  |              | $\chi = 1.3$    |         |                 |         |                  |         |
|------------------|--------------|-----------------|---------|-----------------|---------|------------------|---------|
|                  |              | $\epsilon = 50$ |         | $\epsilon = 75$ |         | $\epsilon = 100$ |         |
|                  |              | NIE             | s.d.    | NIE             | s.d.    | NIE              | s.d.    |
| $\beta_2 = 0$    | Our Approach | 0.021           | (0.038) | 0.025           | (0.038) | 0.019            | (0.041) |
|                  | Truth        | 0.021           | (0.038) | 0.025           | (0.038) | 0.019            | (0.041) |
| $\beta_2 = 1.28$ | Our Approach | 0.004           | (0.038) | 0.004           | (0.036) | 0.002            | (0.040) |
|                  | Truth        | 0.002           | (0.037) | 0.001           | (0.036) | 0.0003           | (0.039) |
| $\beta_2 = 2.56$ | Our Approach | -0.014          | (0.037) | -0.011          | (0.039) | -0.019           | (0.038) |
|                  | Truth        | 0.0007          | (0.034) | 0.005           | (0.037) | -0.003           | (0.035) |
| $\beta_2 = 5.12$ | Our Approach | -0.044          | (0.037) | -0.050          | (0.039) | -0.051           | (0.036) |
|                  | Truth        | 0.011           | (0.027) | 0.006           | (0.027) | 0.003            | (0.027) |

|                  |              | $\chi = 2$      |         |                 |         |                  |         |
|------------------|--------------|-----------------|---------|-----------------|---------|------------------|---------|
|                  |              | $\epsilon = 50$ |         | $\epsilon = 75$ |         | $\epsilon = 100$ |         |
|                  |              | NIE             | s.d.    | NIE             | s.d.    | NIE              | s.d.    |
| $\beta_2 = 0$    | Our Approach | 0.012           | (0.041) | 0.008           | (0.037) | 0.005            | (0.041) |
|                  | Truth        | 0.012           | (0.041) | 0.008           | (0.037) | 0.005            | (0.041) |
| $\beta_2 = 1.28$ | Our Approach | 0.007           | (0.039) | 0.003           | (0.042) | 0.004            | (0.039) |
|                  | Truth        | 0.006           | (0.039) | 0.001           | (0.043) | 0.002            | (0.039) |
| $\beta_2 = 2.56$ | Our Approach | 0.008           | (0.038) | 0.008           | (0.036) | -0.001           | (0.046) |
|                  | Truth        | 0.014           | (0.034) | 0.016           | (0.036) | 0.008            | (0.042) |
| $\beta_2 = 5.12$ | Our Approach | -0.005          | (0.041) | -0.010          | (0.041) | -0.014           | (0.038) |
|                  | Truth        | 0.025           | (0.031) | 0.026           | (0.028) | 0.019            | (0.027) |

Table 1: Simulations to assess sensitivity of estimate of NIE to violations in Assumption 3: n=120
